# Supplementary material for: Varied forms of lamellar [Sn3Se7]n2n−anion: the competitive and synergistic structure-directing effects of metal–amine complex and imidazolium cations
Source: Royal Society of Chemistry journal article supplement (doi:10.1039/c5dt00620a), 2015-01-01
Supplement: c5dt00620a1.pdf [file c5dt00620a1.pdf]

# Varied forms of lamellar $[\text{Sn}_3\text{Se}_7]_n^{2n-}$ anion: the competitive and synergistic structural directing effects of metal-amine complex and imidazolium cations

Cheng-Feng Du,<sup>a,b</sup> Jian-Rong Li,<sup>\*a</sup> Mei-Ling Feng,<sup>a</sup> Guo-Dong Zou,<sup>c</sup> Nan-Nan Shen<sup>a,b</sup> and Xiao-Ying Huang<sup>a</sup>

<sup>a</sup> State Key Laboratory of Structural Chemistry, Fujian Institute of Research on the Structure of Matter, Chinese Academy of Sciences, Fuzhou, Fujian 350002, P. R. China. Fax: (+86) 591-63173145

<sup>b</sup> University of Chinese Academy of Sciences, Beijing, 100049, People's Republic of China.

<sup>c</sup> College of Chemistry and Chemical Engineering, Xinyang Normal University, Xinyang 464000, China

E-mail: [jrli@fjirsm.ac.cn](mailto:jrli@fjirsm.ac.cn)

## Supporting Information

### 1. Structure details

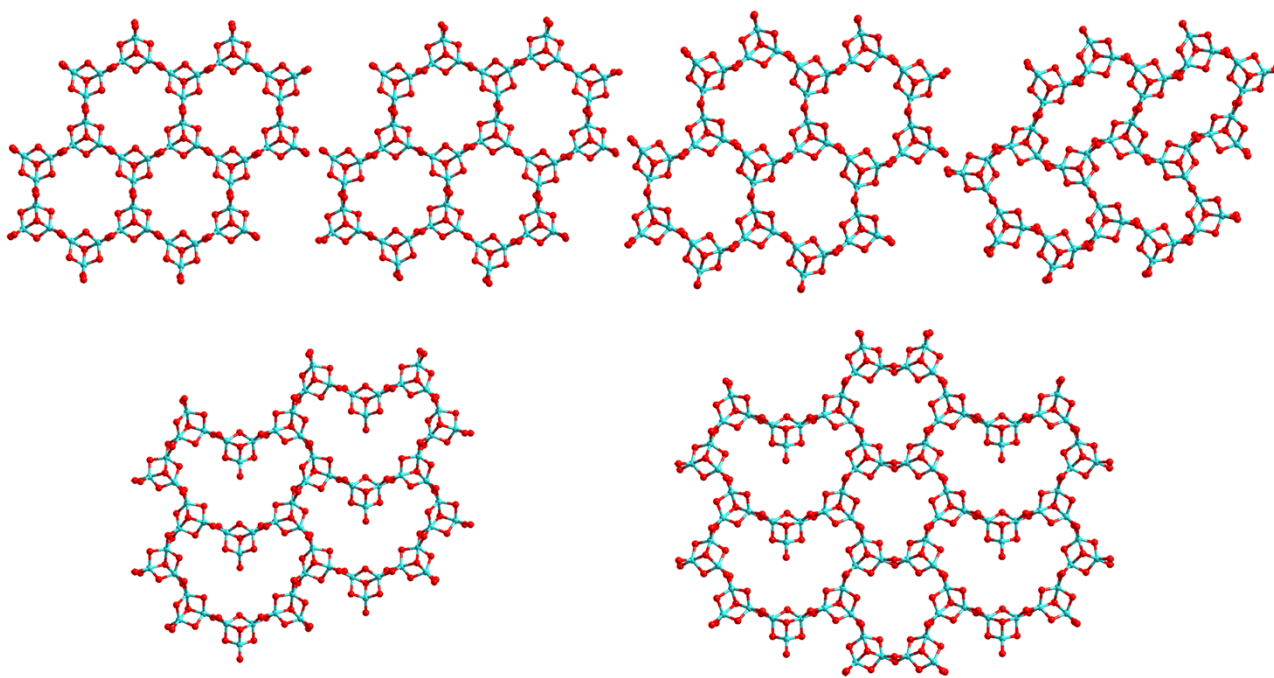

**Figure S1.** The four known lamellar  $[\text{Sn}_3\text{Se}_7]_n^{2n-}$  anions with six-membered rings (up) and two novel lamellar  $[\text{Sn}_3\text{Se}_7]_n^{2n-}$  anions with eight-membered heart-shaped rings (down) reported in this work.

When  $[\text{Sn}_3\text{Se}_4]$  semi-cube was used as a node and  $(\mu_2\text{-Se})_2$  as a ligand, the lamellar  $[\text{Sn}_3\text{Se}_7]_n^{2n-}$  anions in compounds **1**, **2**, **3** and **4** can be simplified as those in Figs. S2-S4, that is, compounds **1** and **2** contains a simplified elliptic six-membered ring while a novel eight-membered heart shaped ring can be found in **3** and **4**.

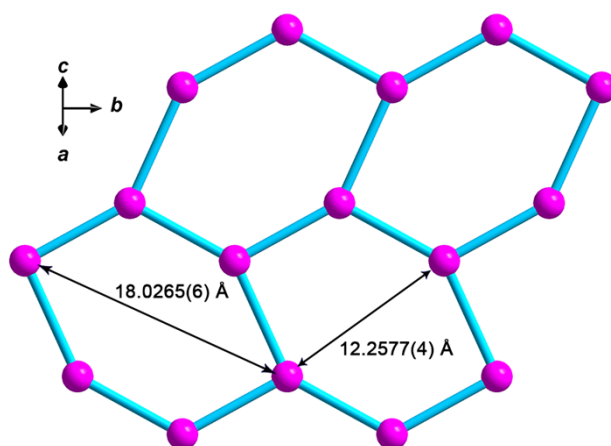

**Figure S2.** The simplified elliptic six-membered ring with  $[\text{Sn}_3\text{Se}_4]$  semi-cube as a node and  $(\mu_2\text{-Se})_2$  as a ligand in **1** and **2**.

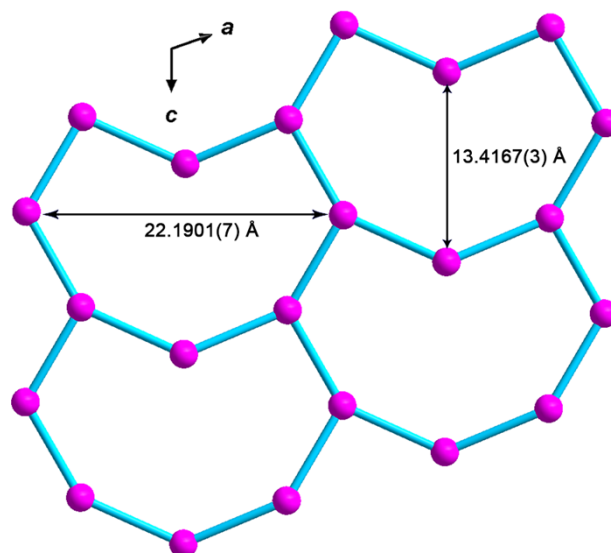

**Figure S3.** The simplified eight-membered heart shaped ring with  $[\text{Sn}_3\text{Se}_4]$  semi-cube as a node and  $(\mu_2\text{-Se})_2$  as a ligand in **3**.

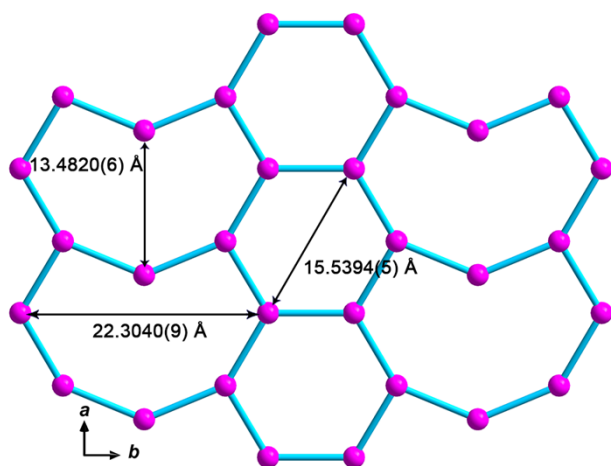

**Figure S4.** The simplified eight-membered heart shaped ring and six-membered ring with  $[\text{Sn}_3\text{Se}_4]$  semi-cube as a node and  $(\mu_2\text{-Se})_2$  as a ligand in **4**.

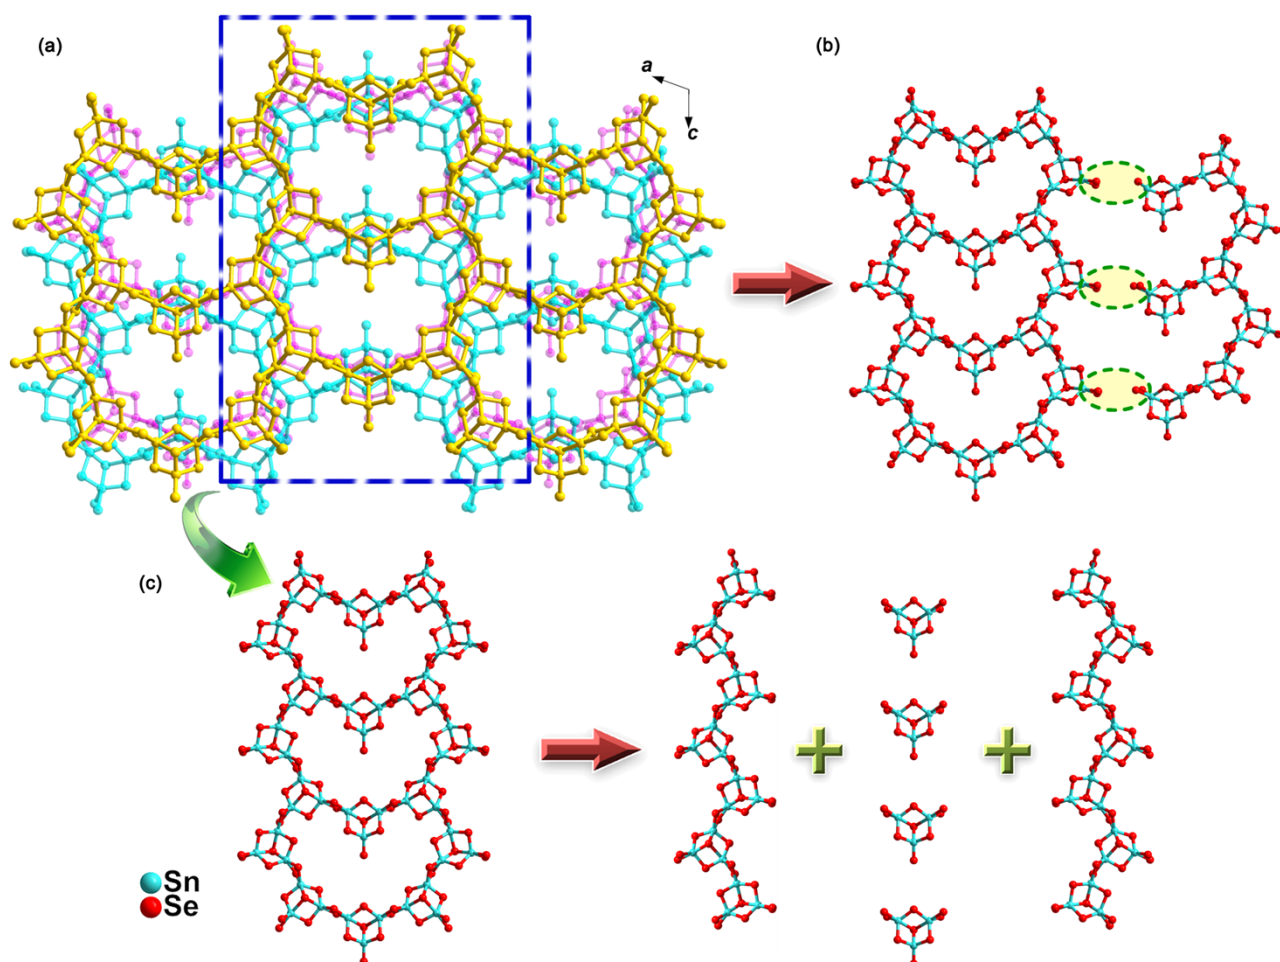

**Figure S5.** (a) A view of the packing of  $[\text{Sn}_3\text{Se}_7]_n^{2n-}$  layers in **3** along the  $b$  axis, (b) the connecting mode of eight-membered heart shaped ring chain in **3** and (c) the eight-membered heart shaped ring chain constructed from the  $[\text{Sn}_3\text{Se}_7]_n^{2n-}$  single chain and  $[\text{Sn}_3\text{Se}_9]$  SBUs.

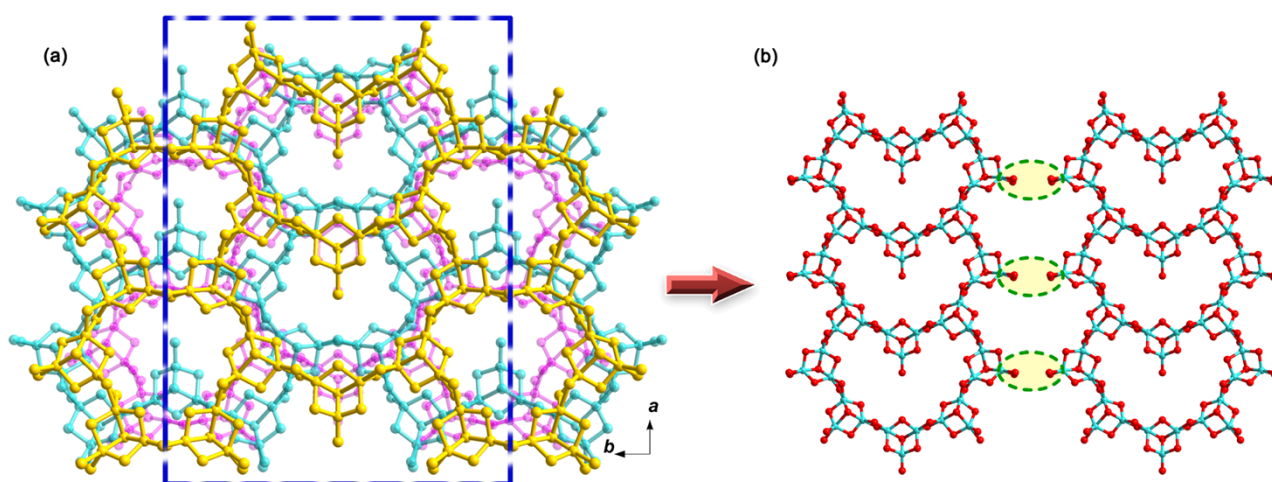

**Figure S6.** (a) A view of the packing of  $[\text{Sn}_3\text{Se}_7]_n^{2n-}$  layers in **4** along the  $c$  axis and (b) the construction of eight-membered heart shaped ring chain in **4**.

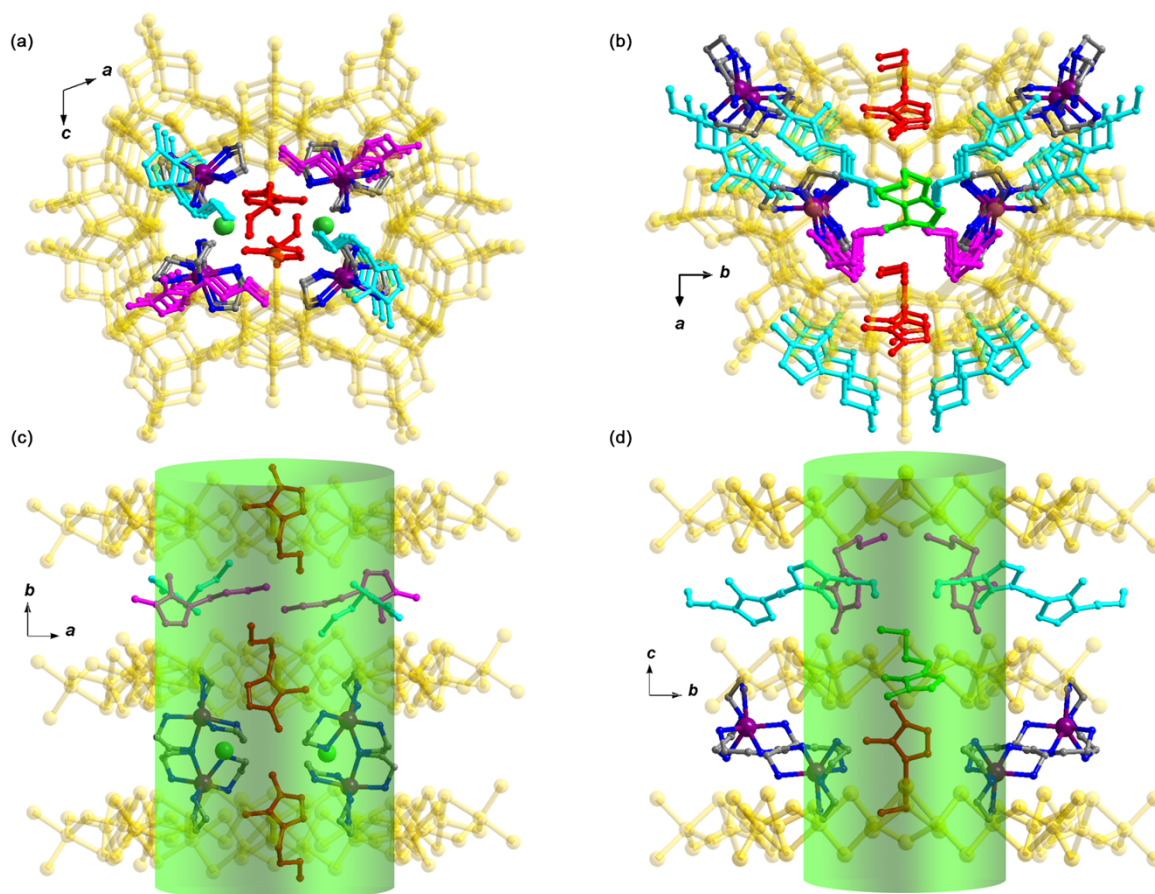

**Figure S7.** Perspective views of the mixed cations filling modes in compounds **3** (a) and **4** (b); the  $[\text{Sn}_3\text{Se}_7]_n^{2n-}$  layers are in a yellow ball-stick mode, and the  $[\text{Bmmim}]^+$  cations in different positions are distinguished by different colors. (c) and (d) show the side views of the mixed cations located in the inter-lamellar space and voids; the green cylinders indicate the channels in **3** and **4**.

## 2. Physical measurements

### 3a). PXRD

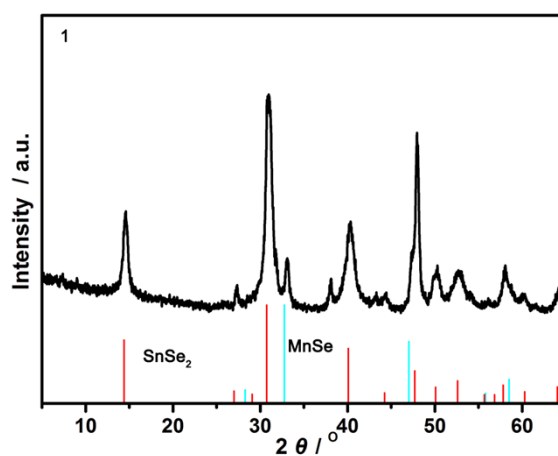

**Figure S8.** The PXRD pattern of the post-TGA residue of compound **1** along with the simulated ones of  $\text{SnSe}_2$  and  $\text{MnSe}$  at bottom for comparison. The TGA residue of compound **1** is identified as a mixture of  $\text{SnSe}_2$  and  $\text{MnSe}$ .

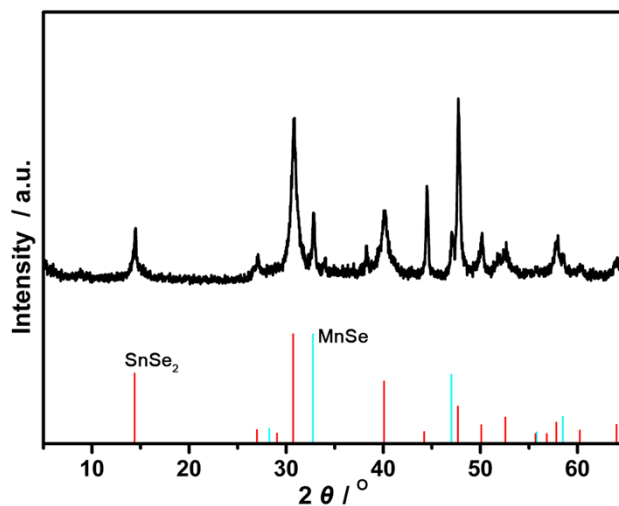

**Figure S9.** The PXRD pattern for the post-TGA residues of compound **2** along with the simulated ones of SnSe<sub>2</sub> and MnSe at bottom for comparison. The residue of compound **2** is identified as a mixture of SnSe<sub>2</sub> and MnSe.

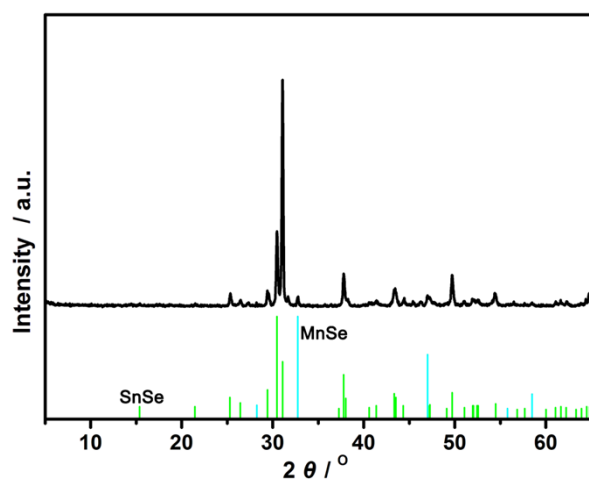

**Figure S10.** The PXRD pattern for the post-TGA residue of compound **3** along with the simulated ones of SnSe and MnSe at bottom for comparison. The residue of compound **3** is identified as a mixture of SnSe and MnSe.

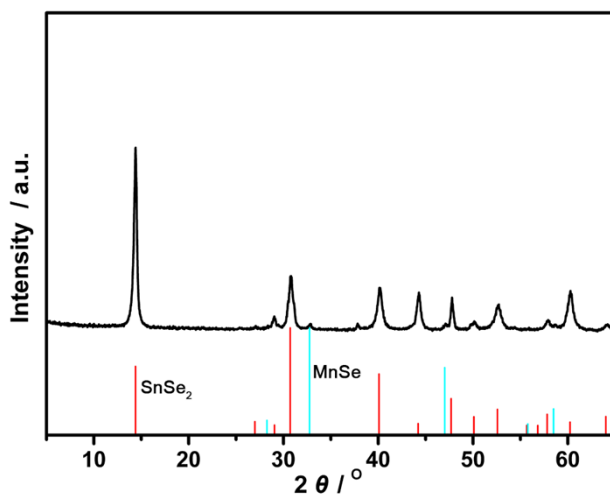

**Figure S11.** The PXRD pattern for the post-TGA residue of compound **4** along with the simulated ones of SnSe<sub>2</sub> and MnSe at bottom for comparison. The residue of compound **4** is identified as the mixture of SnSe<sub>2</sub> and MnSe.

### 3b). EDX spectra

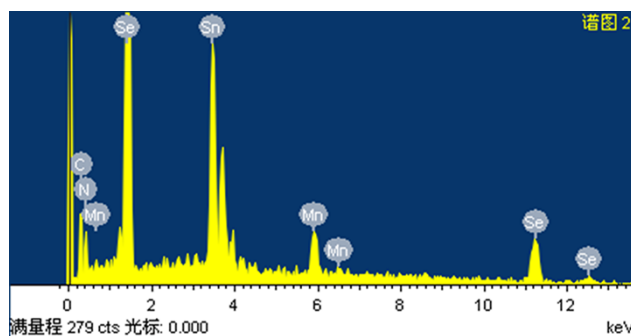

Figure S12. EDX spectrum of compound 1.

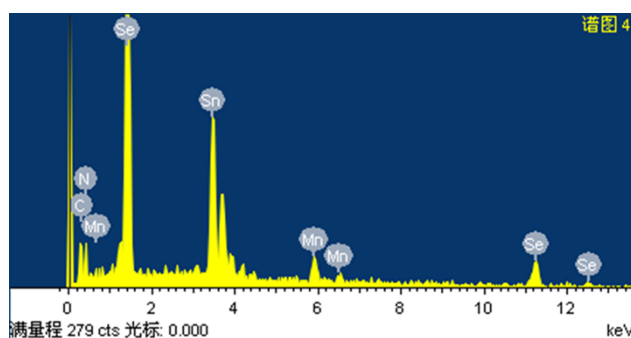

Figure S13. EDX spectrum of compound 2.

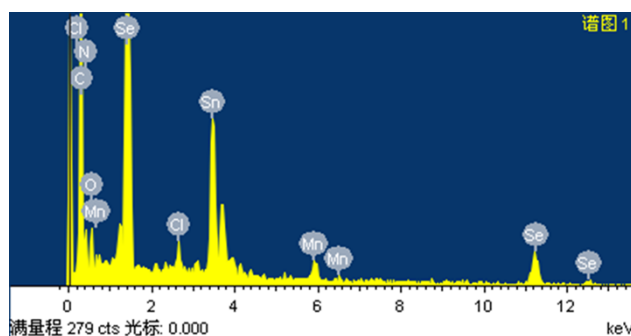

Figure S14. EDX spectrum of compound 3.

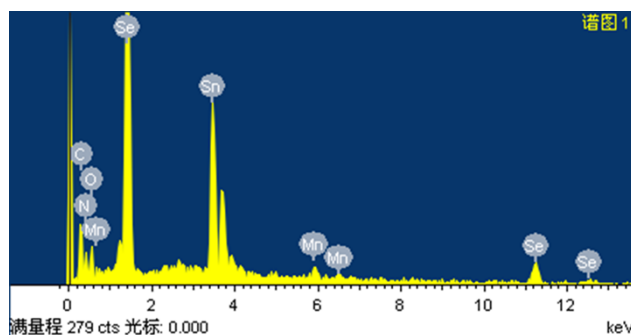

Figure S15. EDX spectrum of compound 4.
